# Supplementary material for: Detection of Anatoxins in Human Urine by Liquid Chromatography Triple Quadrupole Mass Spectrometry and ELISA
Source: MDPI journal article supplement (doi:10.3390/toxins16030129), 2024-03-01
Supplement: s1 [file s1]

**Table S1.** Method stability testing parameters and results (ng/mL) for ATX; measured results were calculated from means of fortified urine samples prepared in triplicate.

| ATX Stability                               |                     |                        |                        |                        |                                  |                              |
|---------------------------------------------|---------------------|------------------------|------------------------|------------------------|----------------------------------|------------------------------|
|                                             | QC<br>Concentration | Initial<br>Measurement | Long-term<br>Stability | Bench-top<br>Stability | Processed<br>Sample<br>Stability | Three Freeze-<br>thaw Cycles |
|                                             | 25.0                | 24.7                   | 23.0                   | 23.0                   | 27.3                             | 22.0                         |
| % difference<br>from initial<br>measurement | ---                 | ---                    | -6.85                  | -6.90                  | 10.6                             | -10.9                        |
|                                             | 100                 | 96.3                   | 89.4                   | 99.6                   | 103                              | 94.9                         |
| % difference<br>from initial<br>measurement | ---                 | ---                    | -7.16                  | 3.4                    | 6.47                             | -1.44                        |
