# Supplementary material for: Detection of Anatoxins in Human Urine by Liquid Chromatography Triple Quadrupole Mass Spectrometry and ELISA
Source: MDPI journal article supplement (doi:10.3390/toxins16030129), 2024-03-01
Supplement: s1 [file s1]

### 10 ng/mL ATX Transition Comparison in Urine

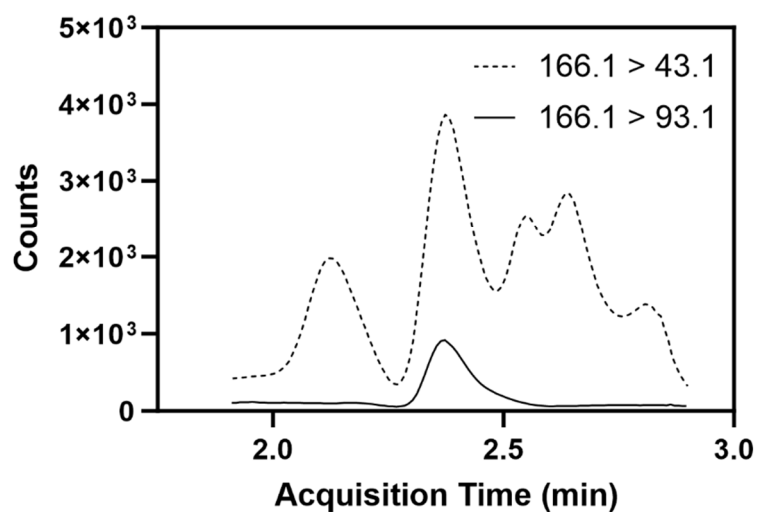

**Figure S2.** Comparison between ATX transitions,  $166.1 > 43.1$  (dotted line) and  $166.1 > 93.1$  (solid line) of a 10 ng/mL calibrator in urine.
