# Supplementary material for: Detection of Anatoxins in Human Urine by Liquid Chromatography Triple Quadrupole Mass Spectrometry and ELISA
Source: MDPI journal article supplement (doi:10.3390/toxins16030129), 2024-03-01
Supplement: s1 [file s1]

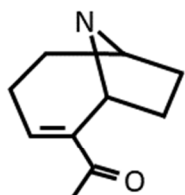

Anatoxin-a (ATX)  
165.23 g/mol

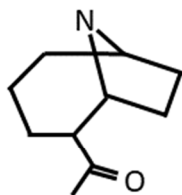

Dihydroanatoxin-a (dhATX)  
167.25 g/mol

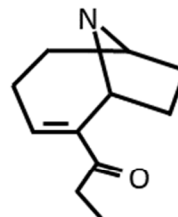

Homoanatoxin-a (HTX)  
179.26 g/mol

**Figure S1.** Structures of ATX, dhATX, and HTX.
