# Supplementary material for: Detection of Anatoxins in Human Urine by Liquid Chromatography Triple Quadrupole Mass Spectrometry and ELISA
Source: MDPI journal article supplement (doi:10.3390/toxins16030129), 2024-03-01
Supplement: s1 [file s1]

**Table S2.** Results of dilution scheme evaluation for ATX-fortified pooled human urine samples showing average (avg), standard deviation (Stdev), percent accuracy, and relative standard deviation (RSD). Fortified samples were prepared in triplicate.

| Dilutions for ATX-fortified Human Urine Samples |                                        |                                       |                                       |                                      |
|-------------------------------------------------|----------------------------------------|---------------------------------------|---------------------------------------|--------------------------------------|
|                                                 | 2000 ng/mL ATX<br>Spike 1:100 Dilution | 2000 ng/mL ATX<br>Spike 1:50 Dilution | 2000 ng/mL ATX<br>Spike 1:20 Dilution | 2000 ng/mL Spike<br>ATX 1:5 Dilution |
| Avg (ng/mL)                                     | 17.2                                   | 44.7                                  | 98.0                                  | 358                                  |
| Calculated Conc<br>(ng/mL)                      | 1723                                   | 2235                                  | 1959                                  | 1790                                 |
| Stdev (ng/mL)                                   | 1.21                                   | 2.96                                  | 6.26                                  | 8.19                                 |
| RSD (%)                                         | 7.02                                   | 6.62                                  | 6.39                                  | 2.29                                 |
| Accuracy (%)                                    | 86.2                                   | 112                                   | 98.0                                  | 89.5                                 |
